# Supplementary material for: Primo Vascular System Accompanying a Blood Vessel from Tumor Tissue and a Method to Distinguish It from the Blood or the Lymph System
Source: Hindawi journal article supplement (doi:10.1155/2013/949245), 2013-01-01

# Supplementary Information

Immunofluorescence staining  
of primo vessel

# Fig. 1.1 Artery: CD31

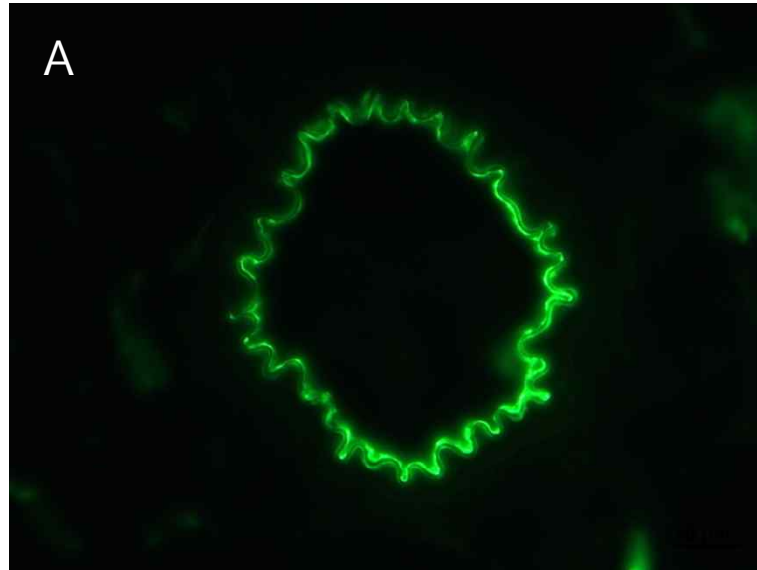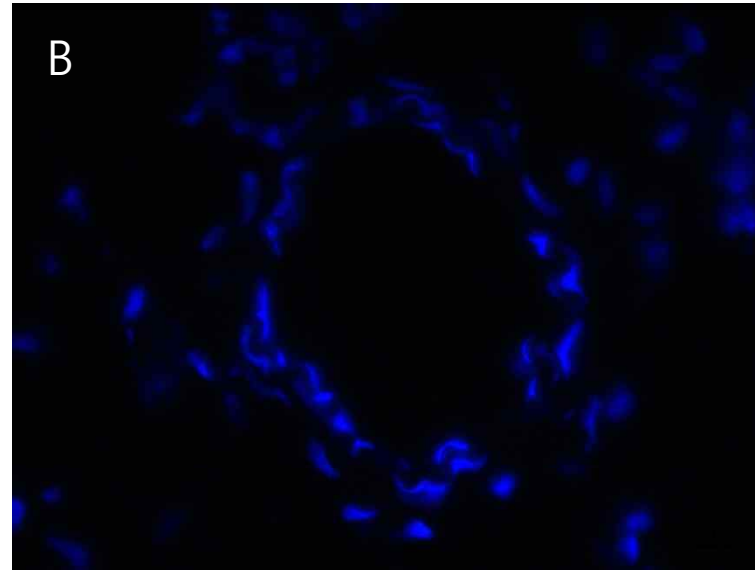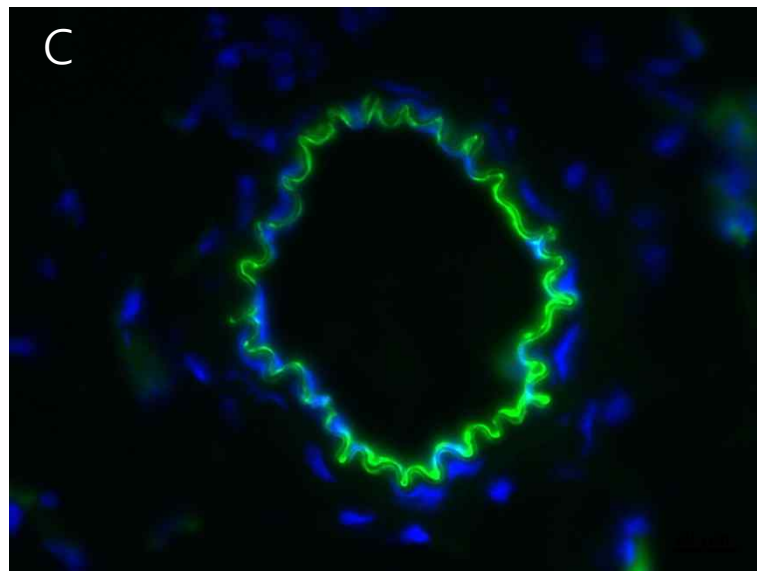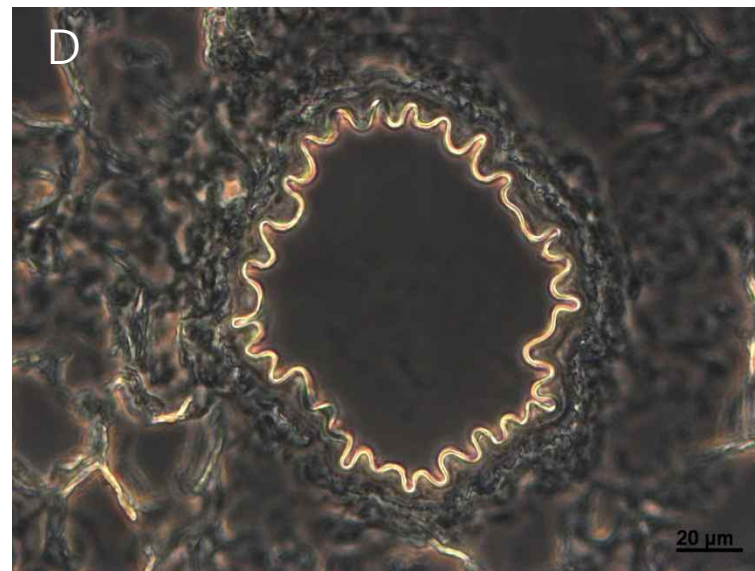

- A – CD31
- B – DAPI
- C – CD31  
+ DAPI
- D – Phase  
contrast

# Fig. 1.2 Vein: CD31

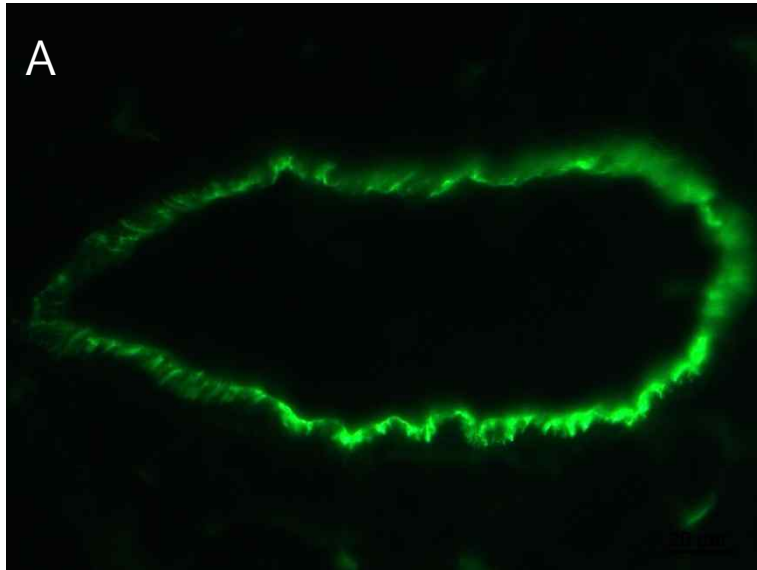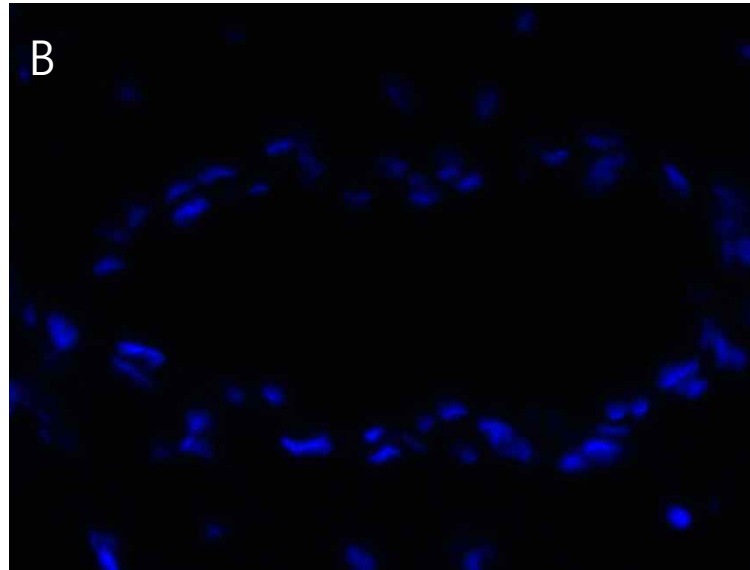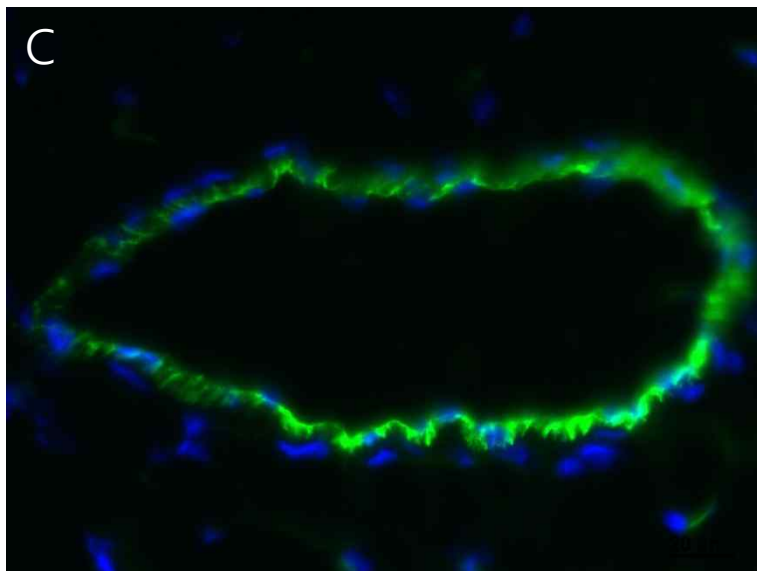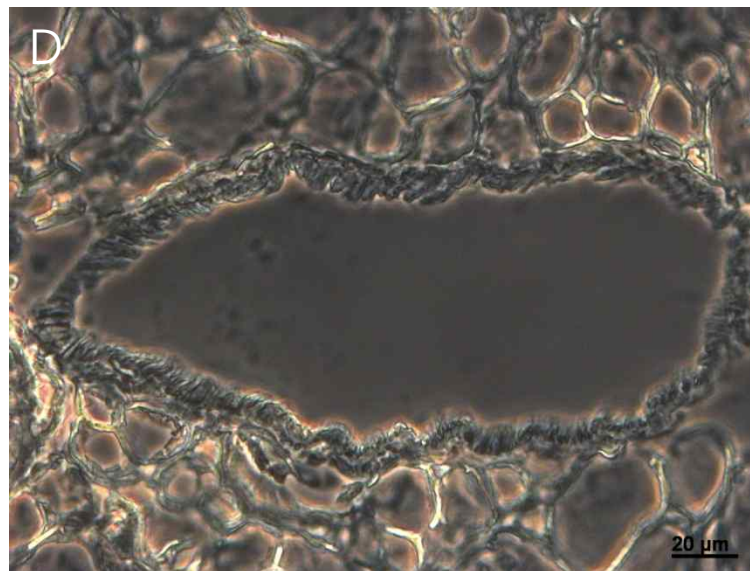

A – CD31  
B – DAPI  
C – CD31  
+ DAPI  
D – Phase  
contrast

# Fig.1.3 Lymph node: CD31

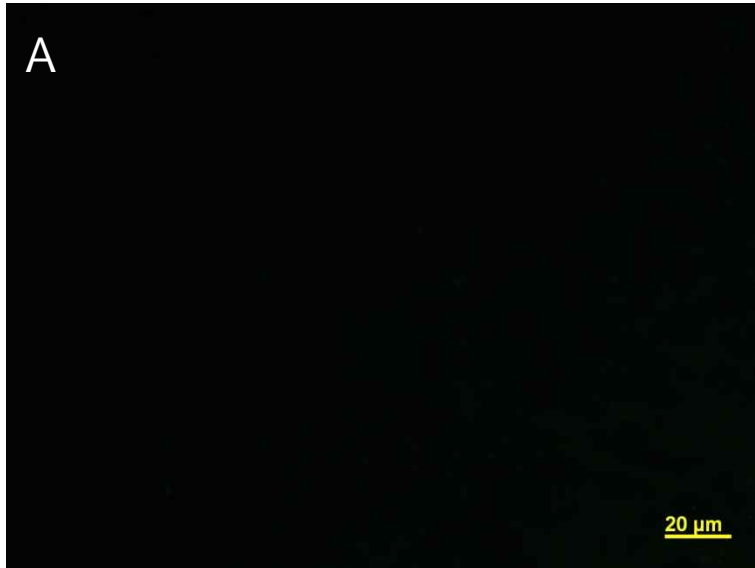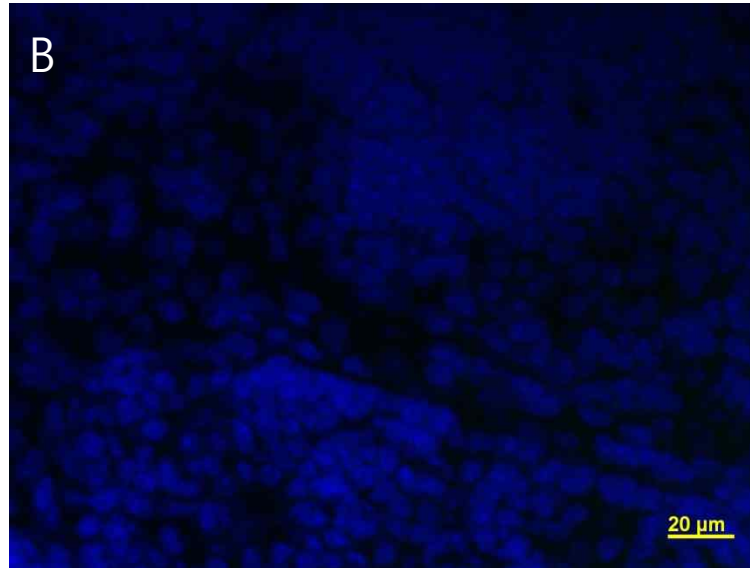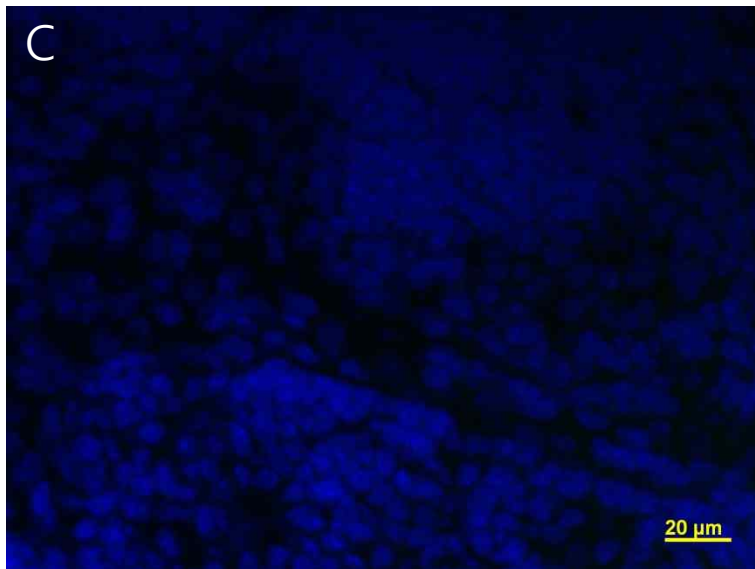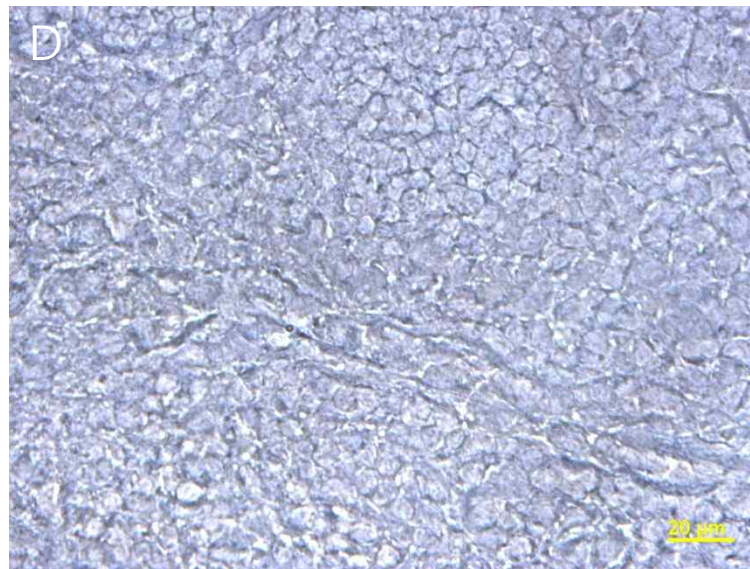

A – CD31  
B – DAPI  
C – CD31  
+ DAPI  
D – Phase  
contrast

Fig. 1.4 Primo vessel on the fascia  
of subcutaneous tumor: CD31

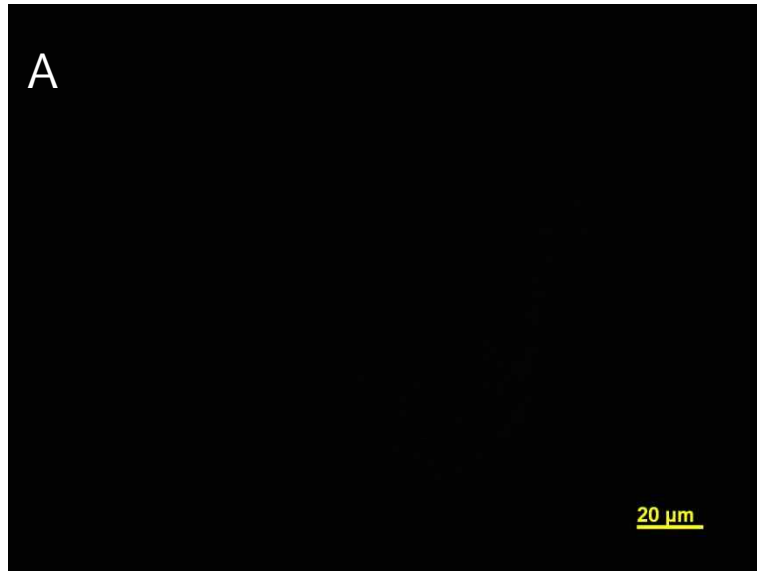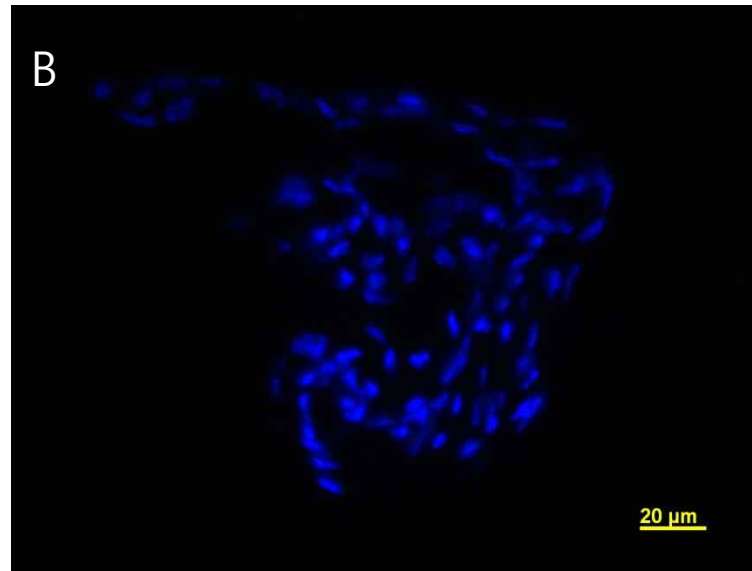

A – CD31  
B – DAPI  
C – CD31  
+ DAPI  
D – Phase  
contrast

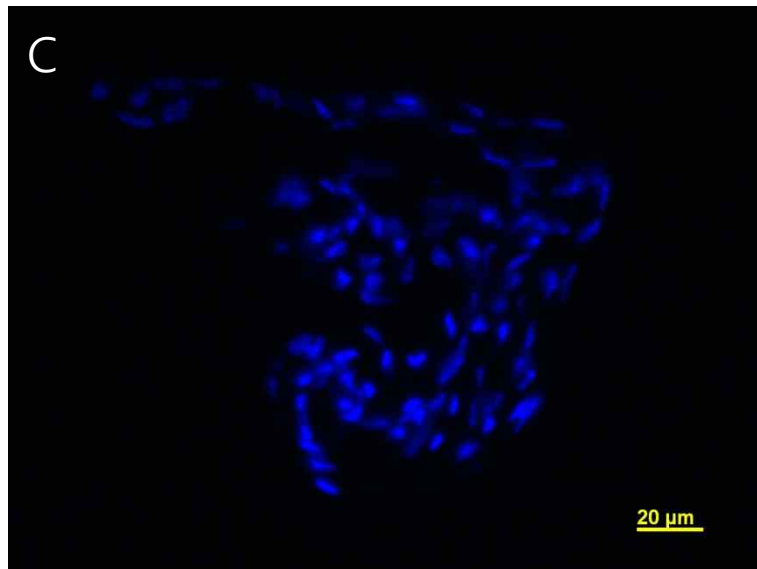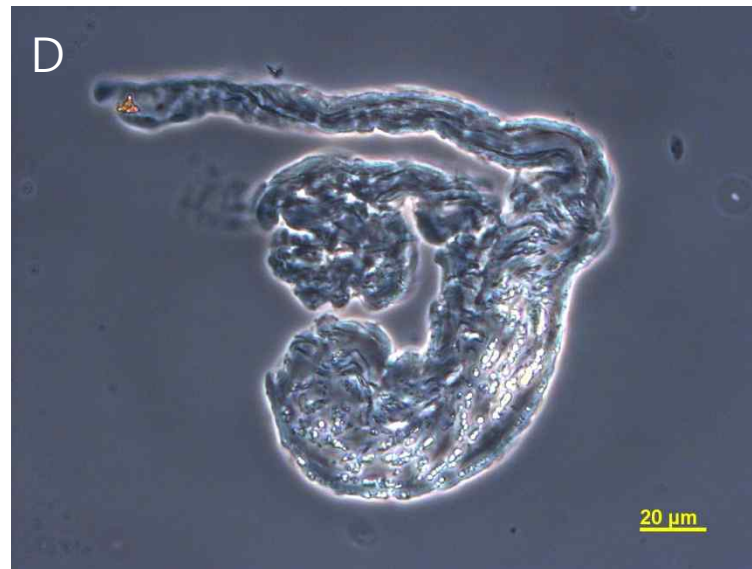



# Fig. 2.1 Artery: LYVE-1

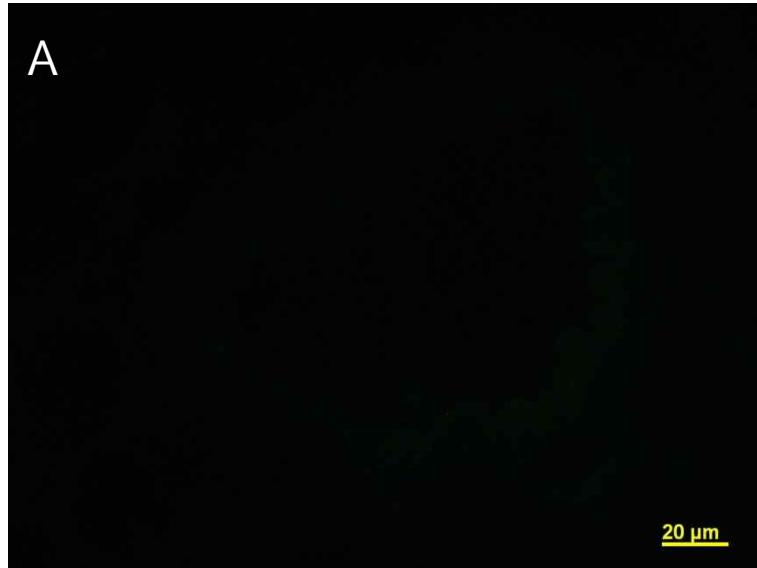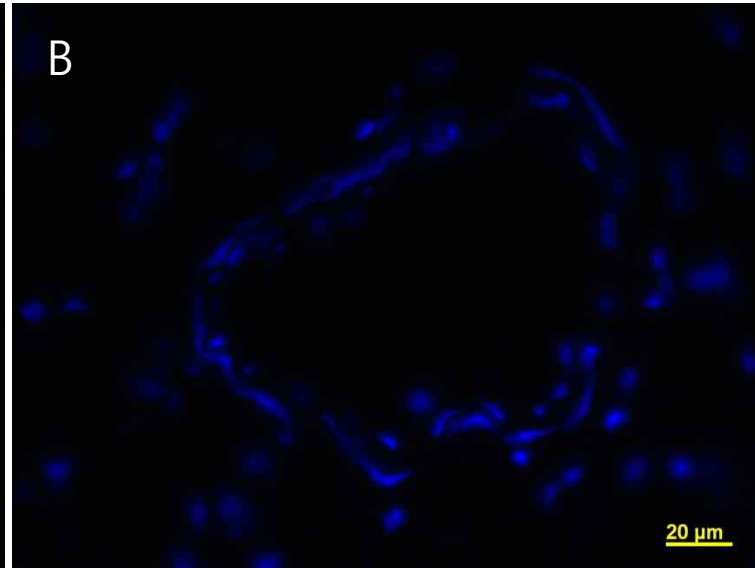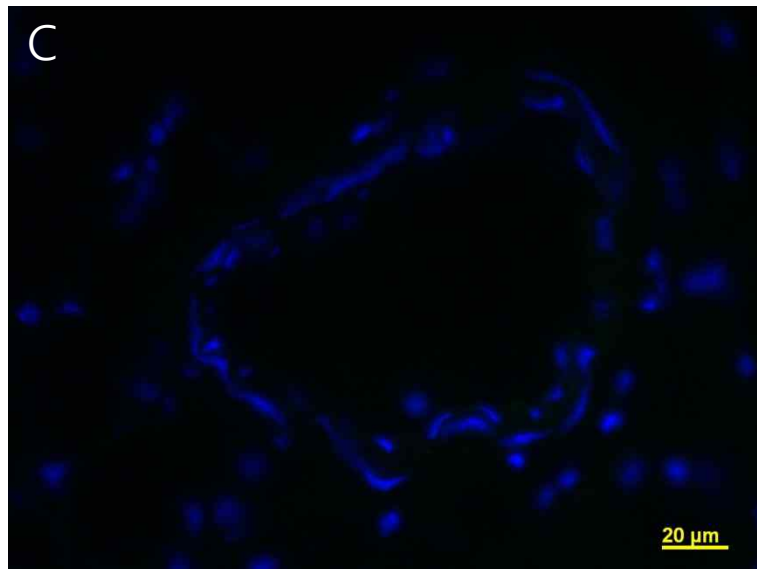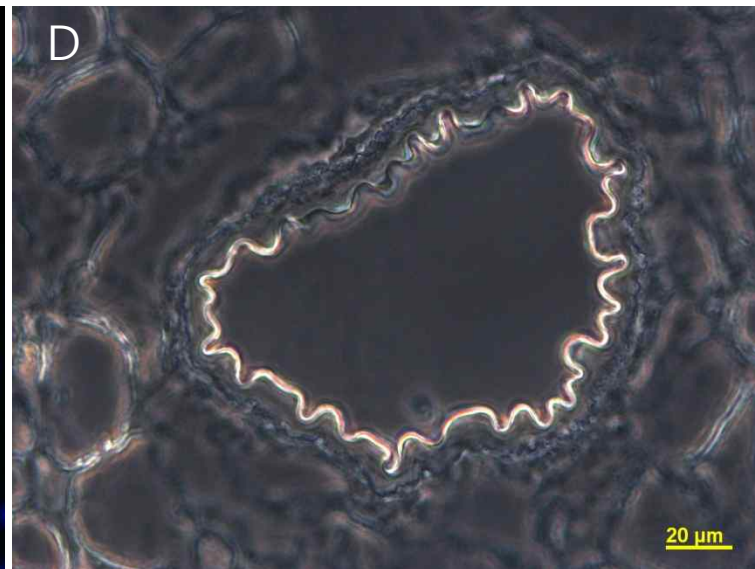

A – LYVE-1  
B – DAPI  
C – LYVE-1  
+ DAPI  
D – Phase  
contrast

## Fig. 2.2 Vein: LYVE-1

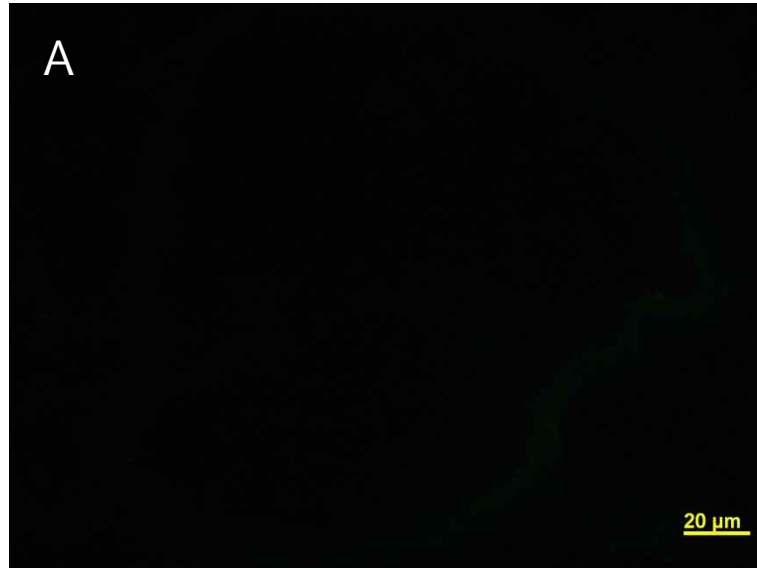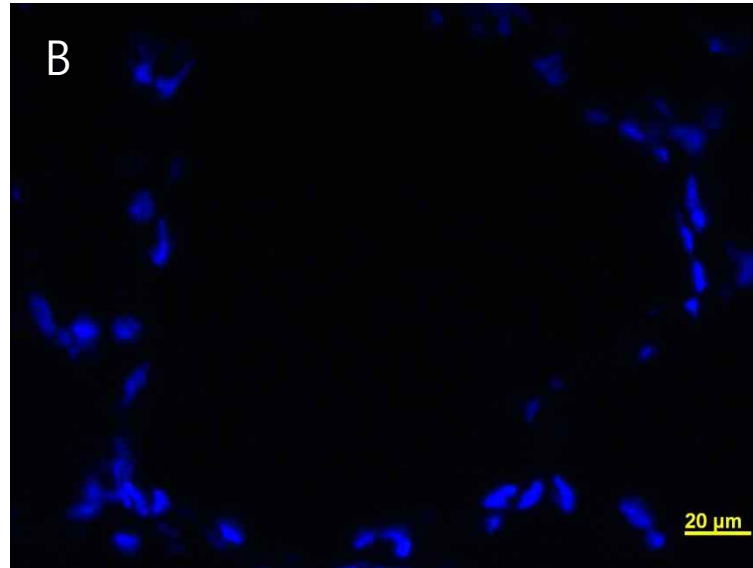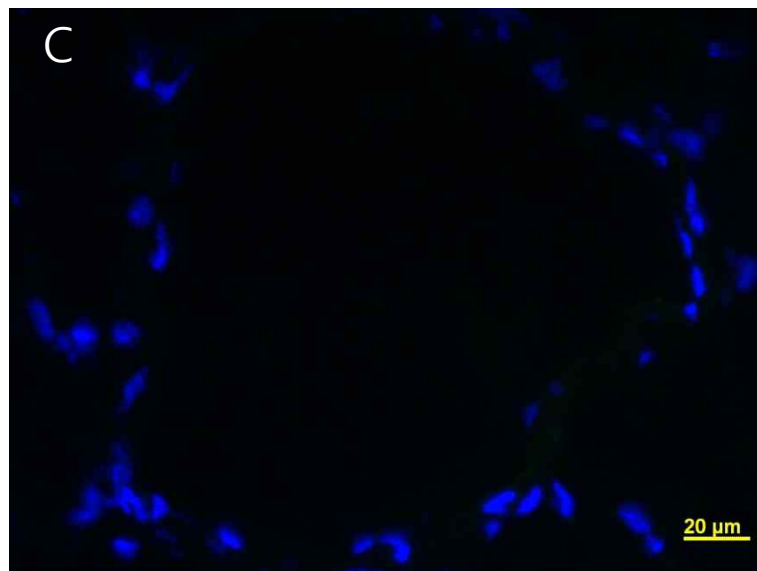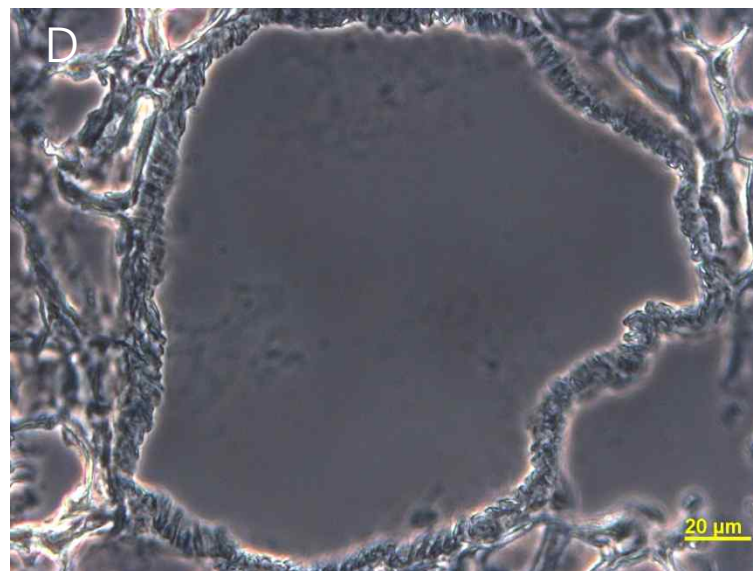

A – LYVE-1  
B – DAPI  
C – LYVE-1  
+ DAPI  
D – Phase  
contrast

## Fig. 2.3 Lymph node: LYVE-1

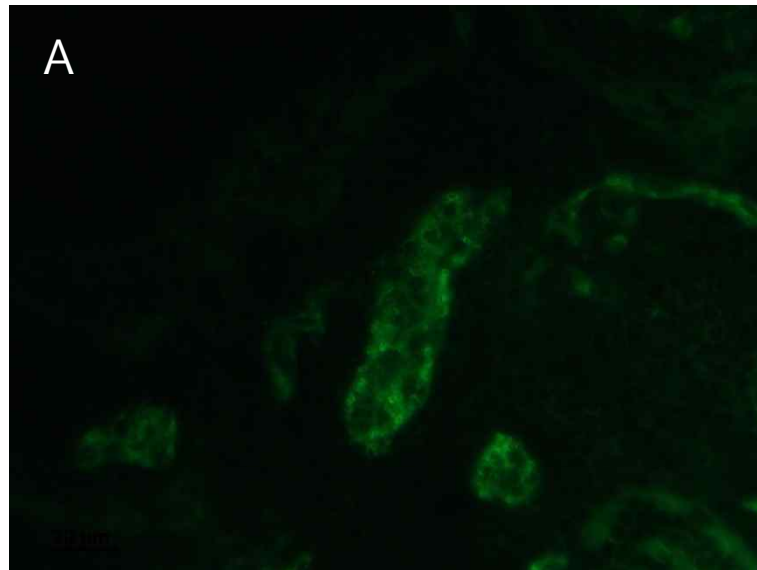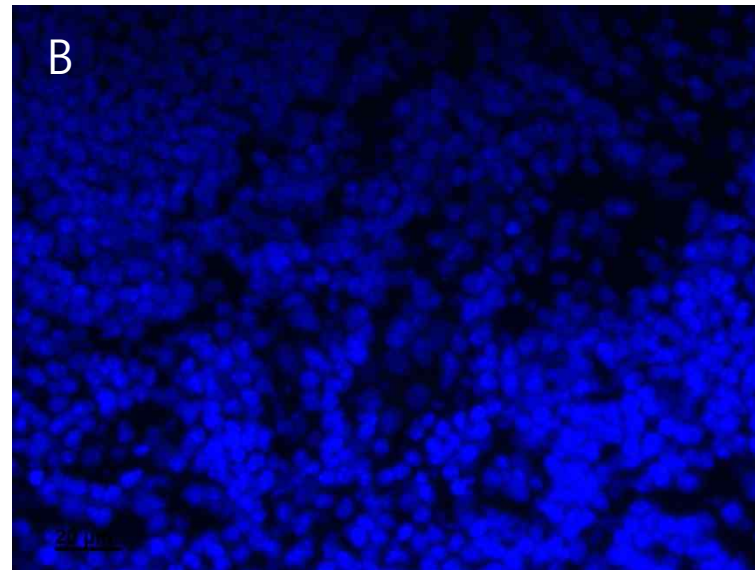

A – LYVE-1  
B – DAPI  
C – LYVE-1  
+ DAPI  
D – Phase  
contrast

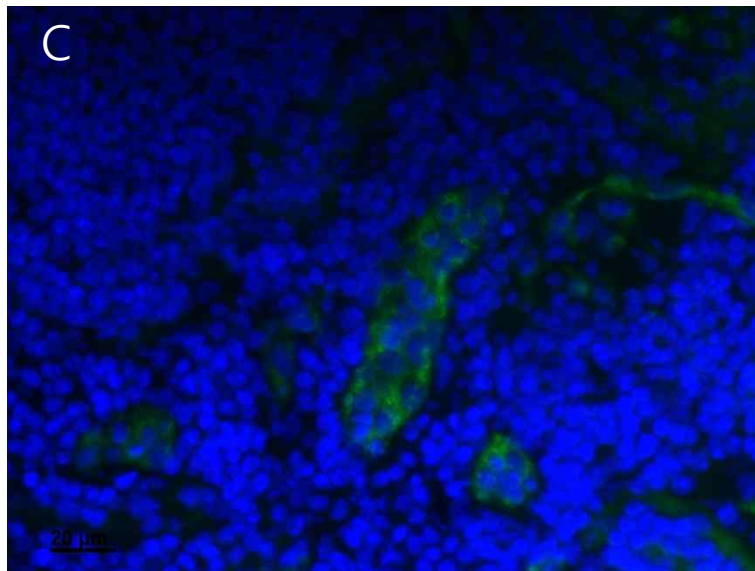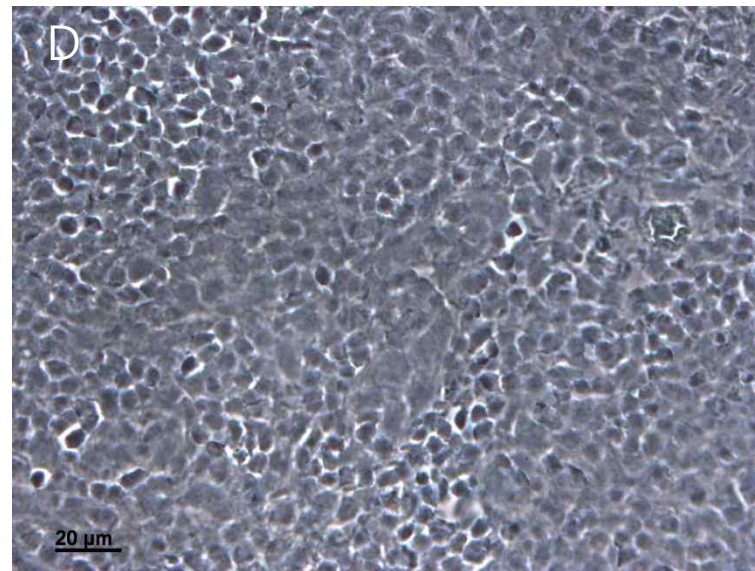



Fig. 2.4 Primo vessel on the fascia  
of subcutaneous tumor: LYVE-1

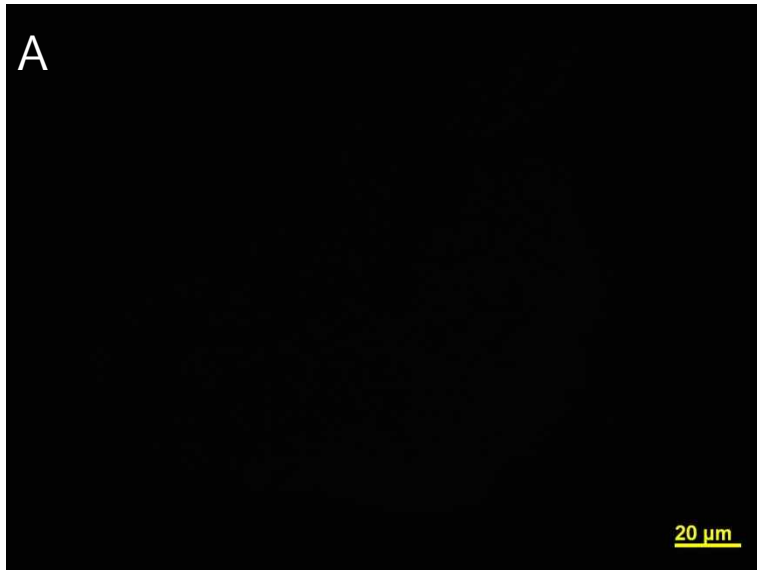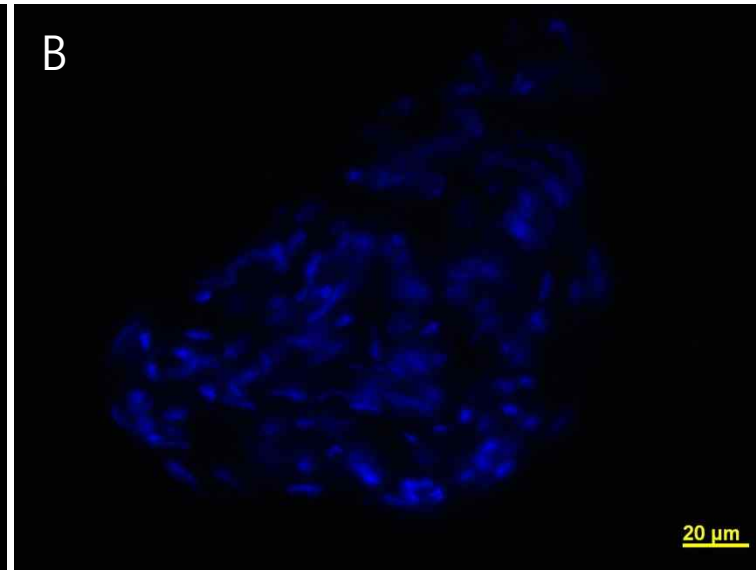

A – LYVE-1  
B – DAPI  
C – LYVE-1  
+ DAPI  
D – Phase  
contrast

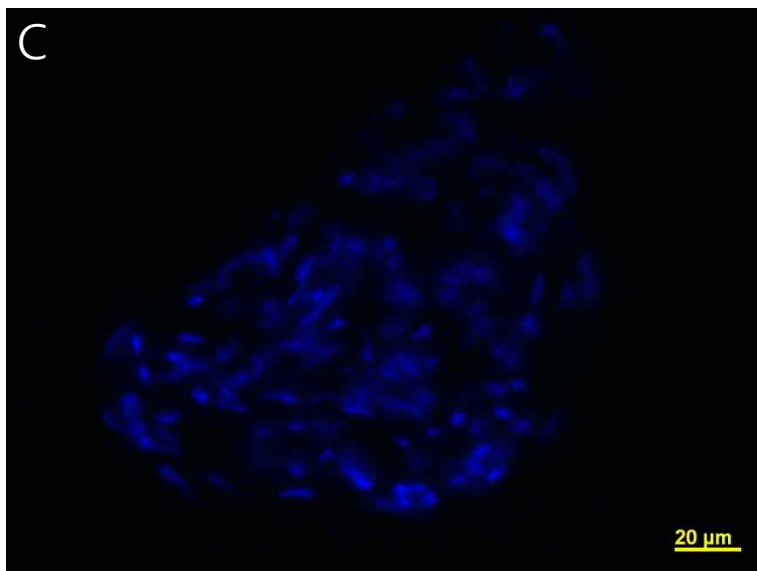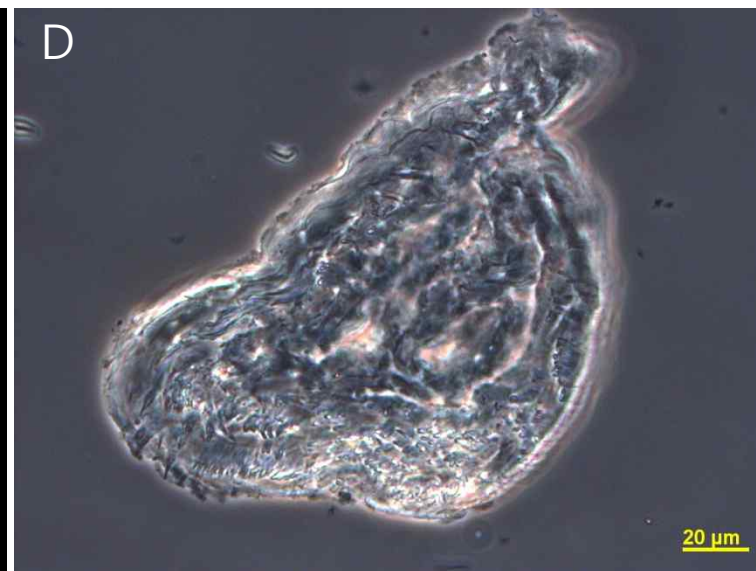

Supplement: f1 [file 949245.f1.pdf]
